# Supplementary material for: Neolignans isolated from industrial hemp (Cannabis sativa L.) roots have cytotoxic effects on cancer cells
Source: J Cannabis Res. 2025 Aug 16;7:58. doi: 10.1186/s42238-025-00316-5 (PMC12357354; doi:10.1186/s42238-025-00316-5)
Supplement: Supplementary file 1 — Supplementary Material 1 [file 42238_2025_316_MOESM1_ESM.xlsx]

## Sheet: dadahol_B
	1H shifts			13C shifts
position	JNP 65 168	JEOL		JNP 65 168	JEOL
1				133.9, 133.3, 132.67, 132.66	133.6, 133.3, 132.69, 132.67
2	6.75 – 7.09	7.08, 7.06, 7.02		111.7. 111.6, 111.5*	111.70, 111.57, 111.49
3				152.2, 152.1, 149.7, 149.4, 149.0, 148.8, 147.4, 147.2	152.18, 152.08
4					149.7, 149.4, 148.9, 148.8
5	6.75 – 7.09	6.77 – 6.71		116.0, 115.9, 115.8	116.5, 166.0, 115.8
6	6.75 – 7.09	6.93 – 6.85		121.07, 120.95, 120.89, 120.81, 119.3, 119.0	121.04, 120.92, 120.87, 120.78
7	4.88 – 4.91	4.90		74.7, 74.2	74.7, 74.2
8	4.68	4.67		80.4**, 83.6	84.0, 83.6
9	4.42 – 4.50. 4.27. 4.15	4.45, 4.27, 4.15		65.2	65.27, 65.22
1’				133.9, 133.3, 132.67, 132.66	133.6, 133.3, 132.69, 132.67
2’	6.75 – 7.09	7.08, 7.06, 7.02		111.7. 111.6, 111.5*	111.70, 111.57, 111.49
3’				152.2, 152.1, 149.7, 149.4, 149.0, 148.8, 147.4, 147.2	147.4, 147.1
4’					149.7, 149.4, 148.9, 148.8
5’	6.75 – 7.09	6.77 – 6.71		116.0, 115.9, 115.8	116.5, 166.0, 115.8
6’	6.75 – 7.09	6.93 – 6.85		121.07, 120.95, 120.89, 120.81, 119.3, 119.0	121.04, 120.92, 120.87, 120.78
7’	6.62, 6.60	6.64, 6.62		134.9, 133.6	134.9
8’	6.24	6.26		123.30, 123.29	123.30, 123.27
9’	4.79	4.80		66.2	66.2
1’’				127.2, 127.03, 127.01	127.17, 127.00, 126.97
2’’	7.46	7.47		131.3	131.26, 131.23, 131.20
3’’	6.75 – 7.09	6.81 – 6.76		116.8	116.8 (br)
4’’				161.34, 161.30, 160.10	161.4
5’’	6.75 – 7.09	6.81 – 6.76		116.8	116.8 (br)
6’’	7.46	7.47		131.3	131.26, 131.23, 131.20
7’’	7.65	7.65		146.84, 146.77, 146.74	146.81, 146.76, 146.71
8’’	6.37	6.38		115.1, 114.8, 114.7	115.1
9’’				169.1, 168.9, 168.8	168.9, 168.7
1’’’				127.2, 127.03, 127.01	127.17, 127.00, 126.97
2’’’	7.32, 7.31	7.34		131.3	131.26, 131.23, 131.20
3’’’	6.75 – 7.09	6.81 – 6.76		116.8	116.8 (br)
4’’’				161.34, 161.30, 160.10	161.4
5’’’	6.75 – 7.09	6.81 – 6.76		116.8	116.8 (br)
6’’’	7.32,7.31	7.34		131.3	131.26, 131.23, 131.20
7’’’	7.27, 7.26	7.27		146.84, 146.77, 146.74	146.81, 146.76, 146.71
8’’’	6.14	6.13		115.1, 114.8, 114.7	114.8, 114.6
9’’’				169.1, 168.9, 168.8	169.1
O-Me	3.82	3.83, 3.79		56.5	56.50, 56.47, 56.36
O-Me	3.79	3.83, 3.79		56.4	56.50, 56.47, 56.36
	referenced using MeOH shifts set to 3.30, 49.0
	* reported twice in two different places, with different shifts
	** probably transposed numbers
